# Supplementary figures and images for: Effectiveness of Interventions and Behaviour Change Techniques for Improving Dietary Intake in Young Adults: A Systematic Review and Meta-Analysis of RCTs
Source: MDPI journal article supplement (doi:10.3390/nu11040825), 2019-04-11

Figure S7: Residuals from final model

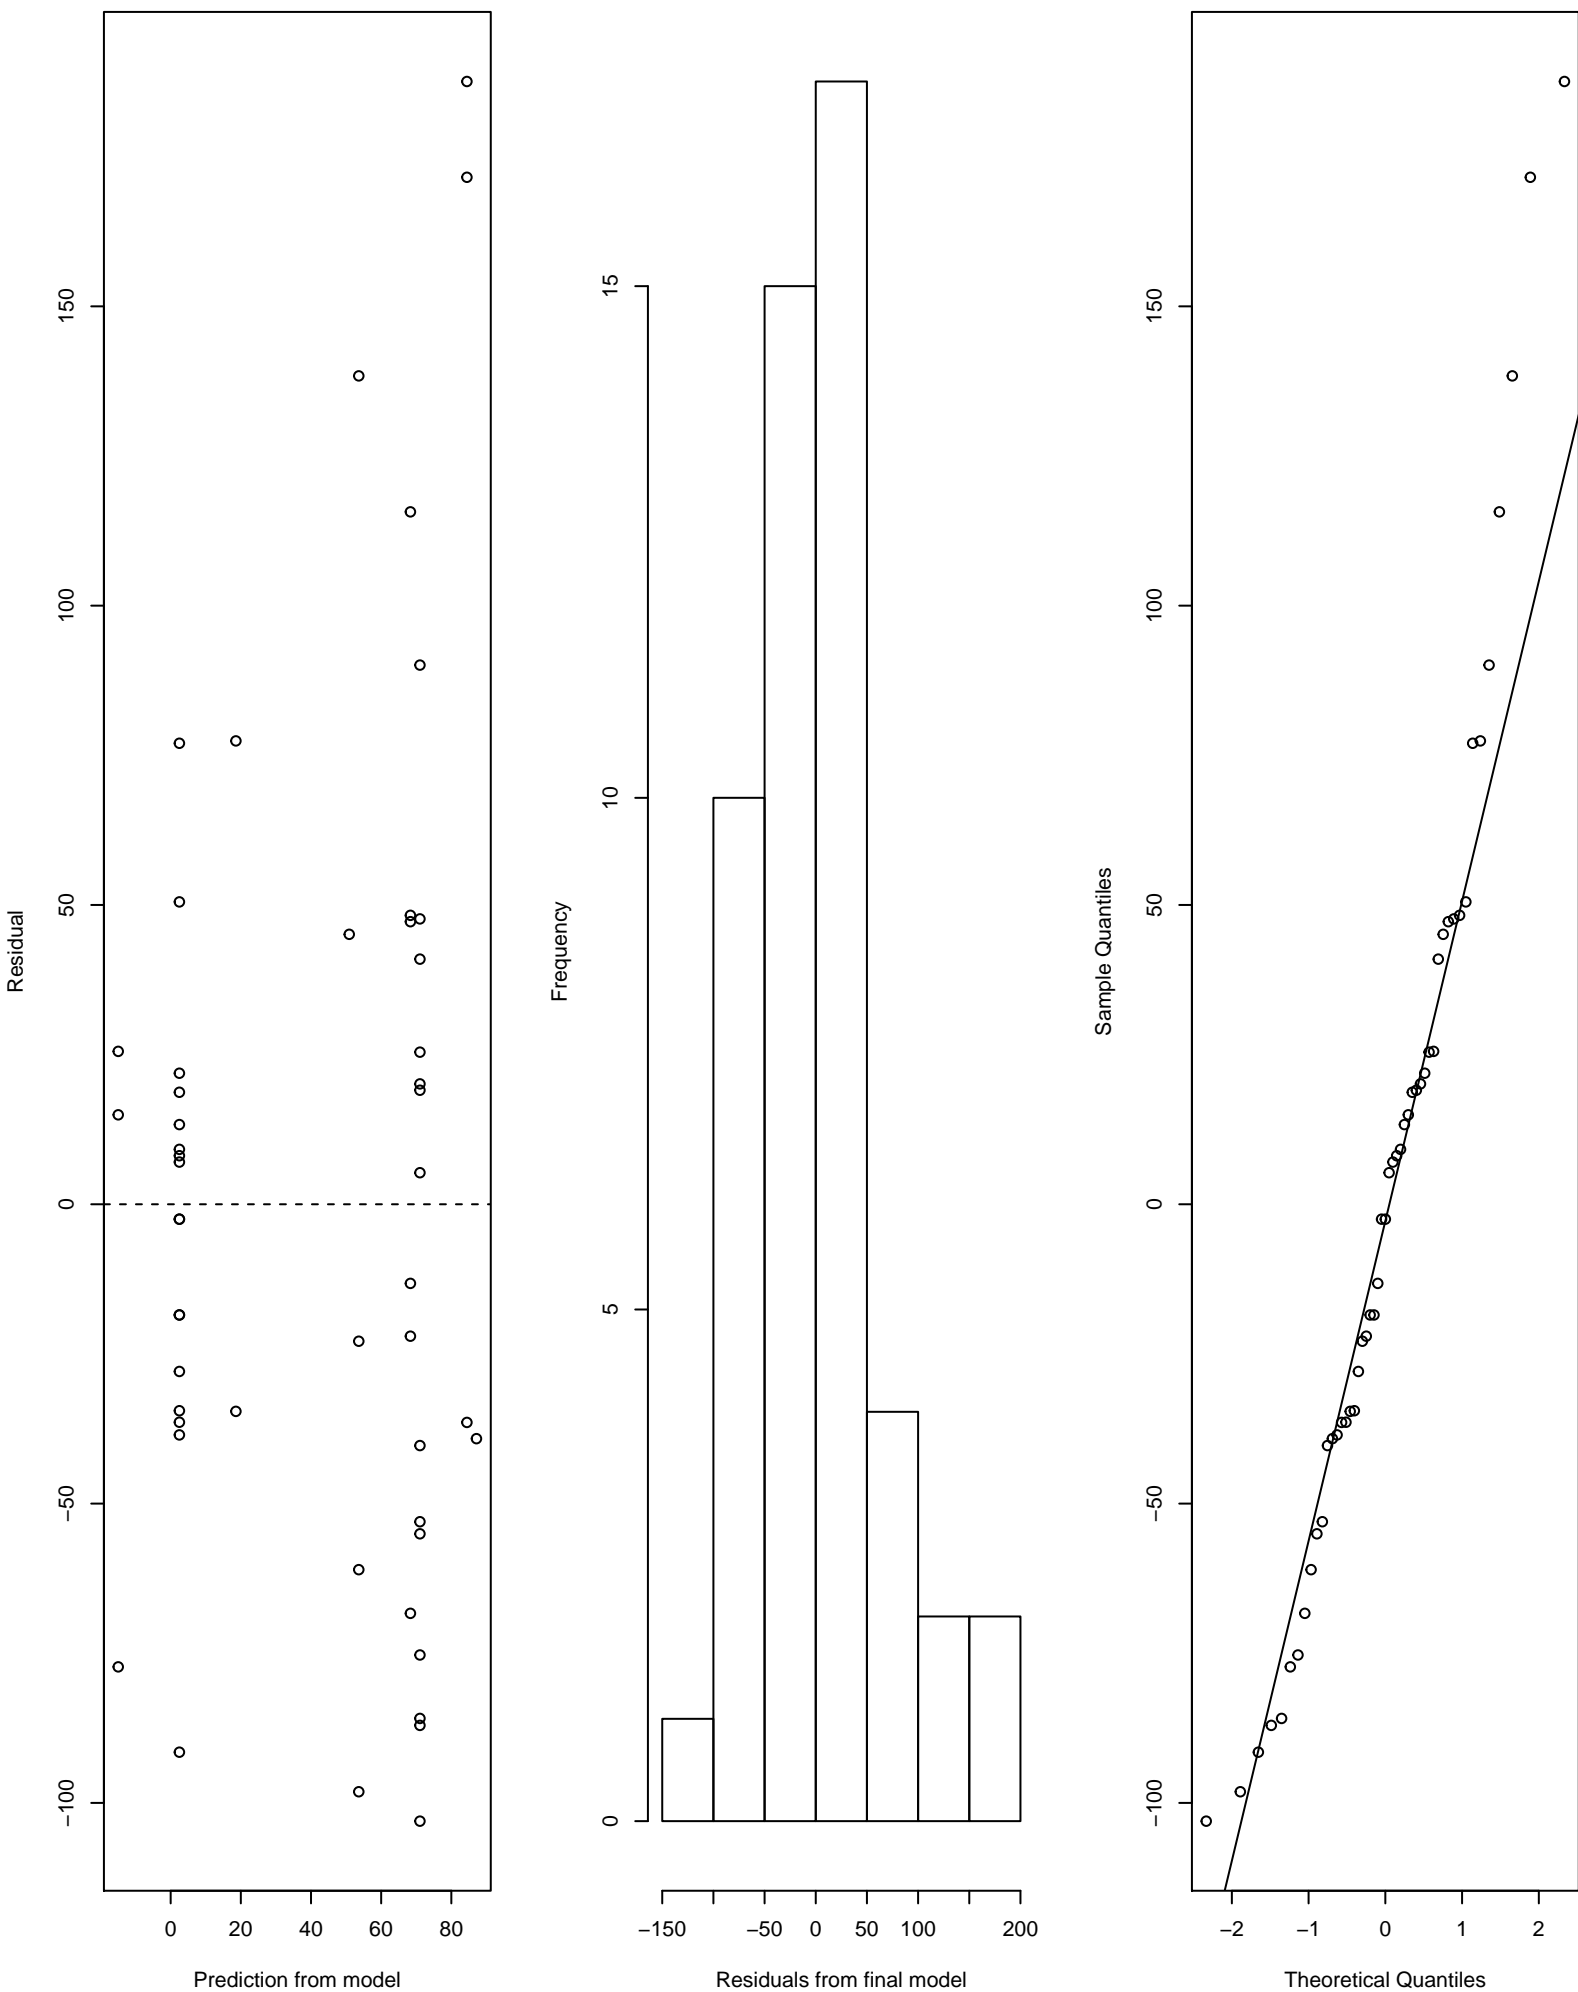

Supplement: s1 [file s1]

Figure S5: Funnel Plot vs Standard Error

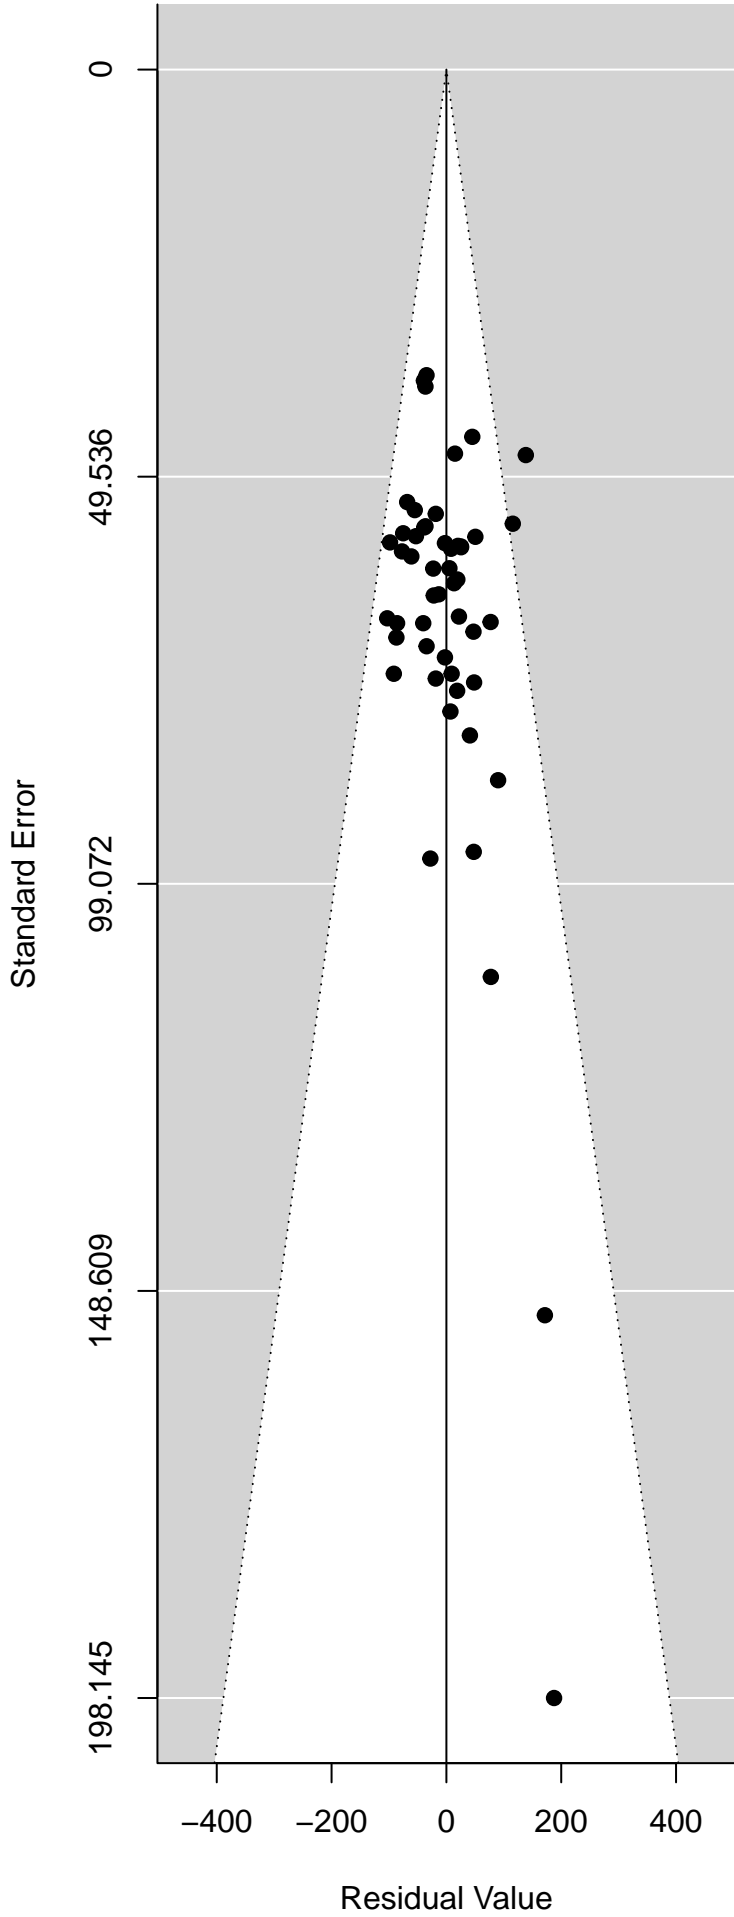

Funnel Plot – removed Chang (2010)

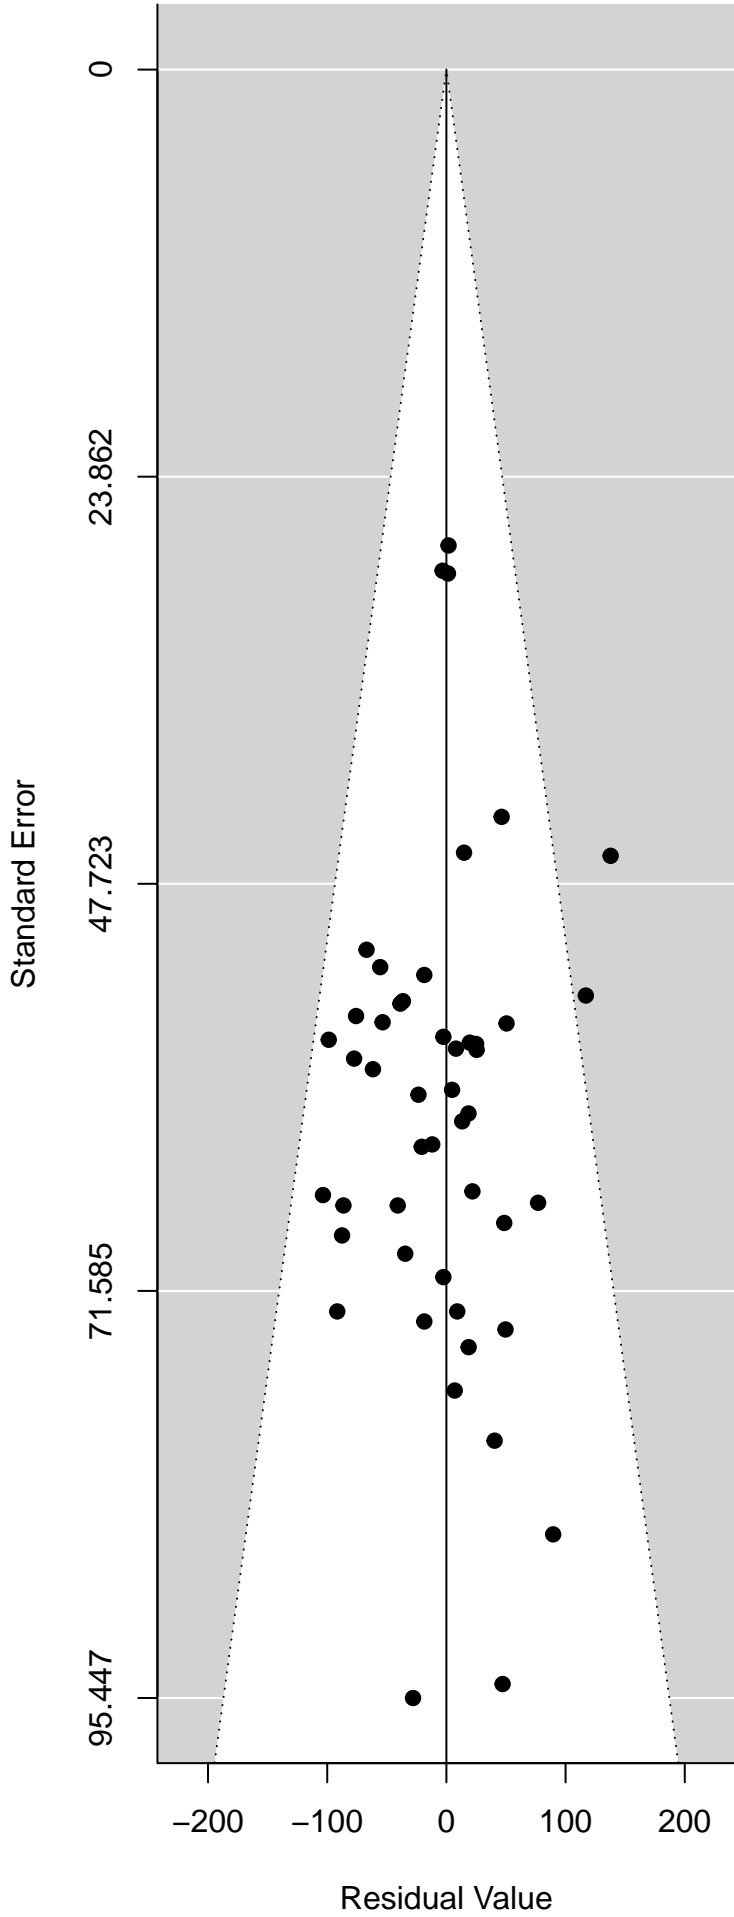

Supplement: s1 [file s1]

**Figure S4: Mean Difference – Total Energy Intake kJ/day**

Study/Treatment/Months

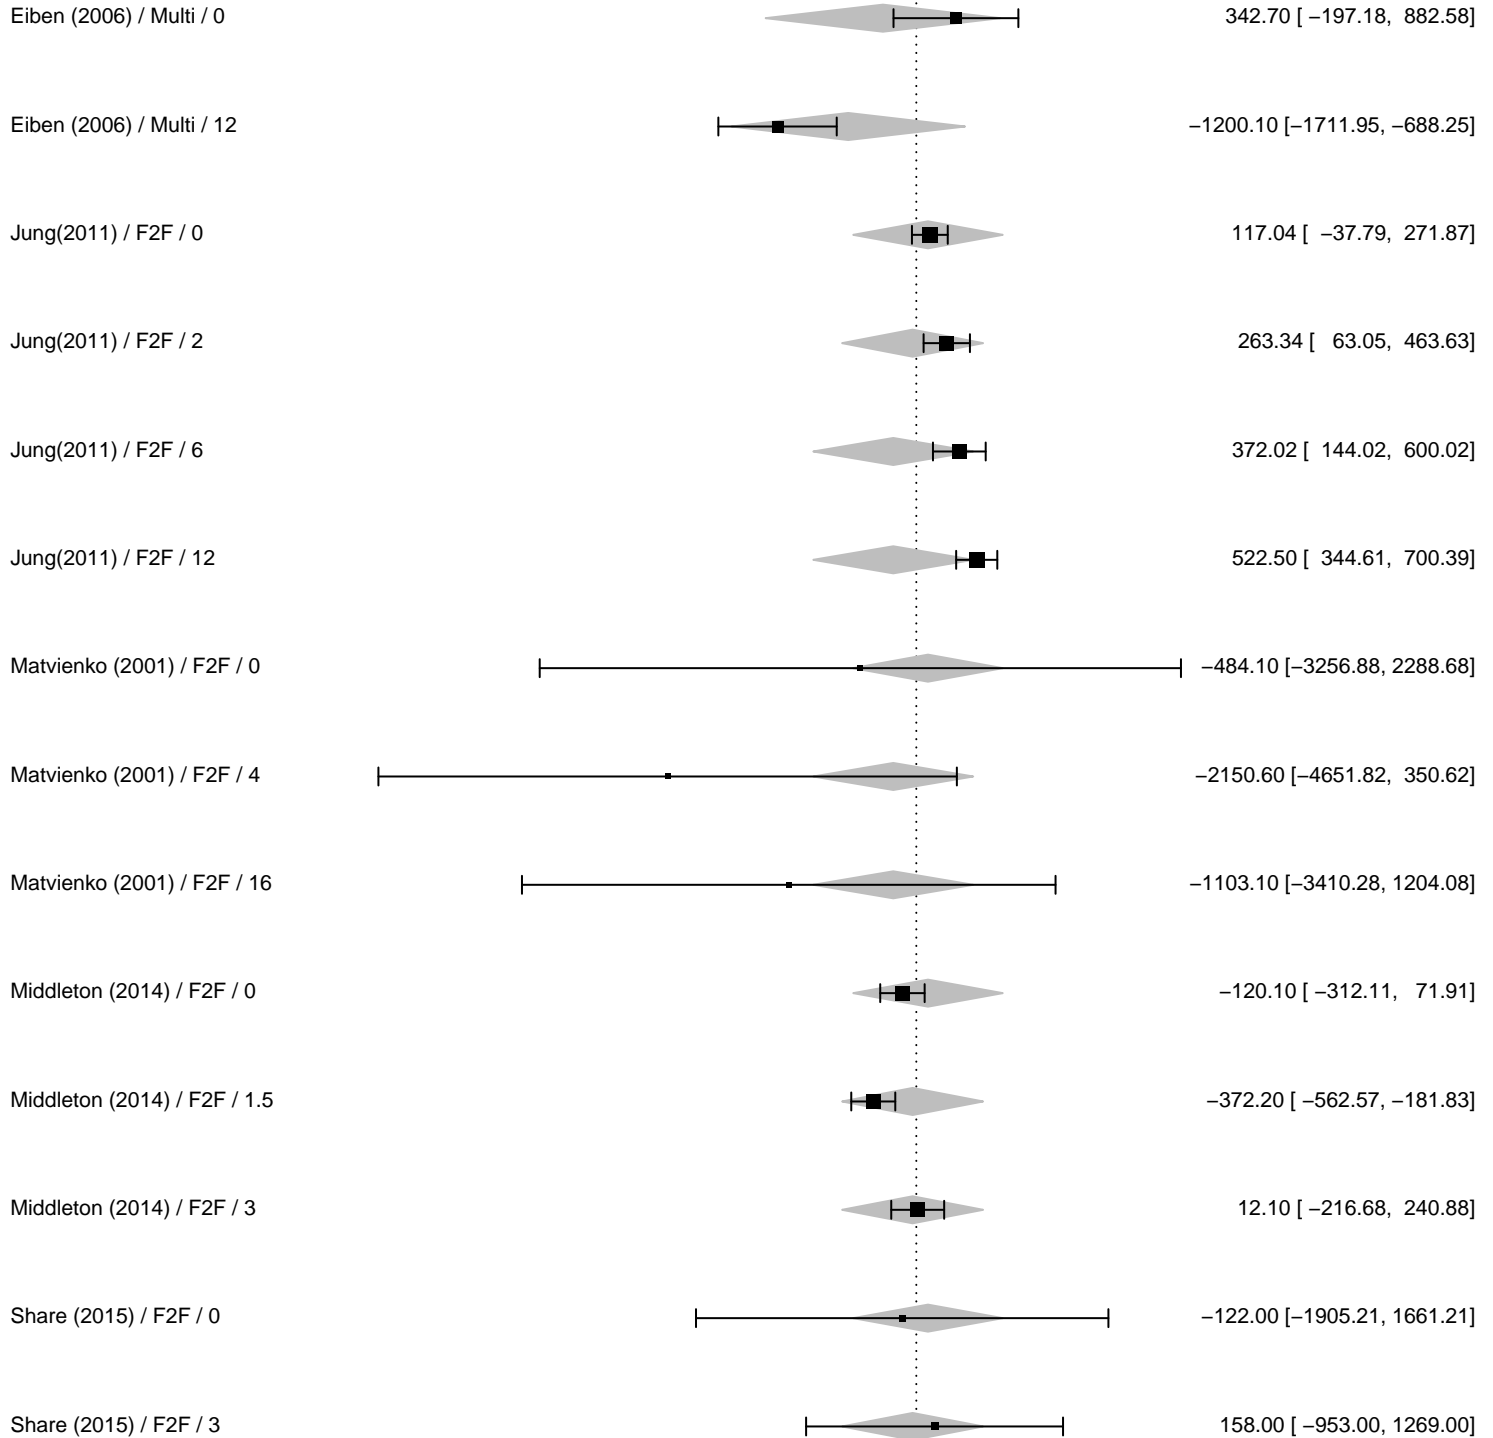

Mean Difference

Supplement: s1 [file s1]

# Figure S8: Mean Difference – Fruit & Veg g/day

Study/Treatment/Months

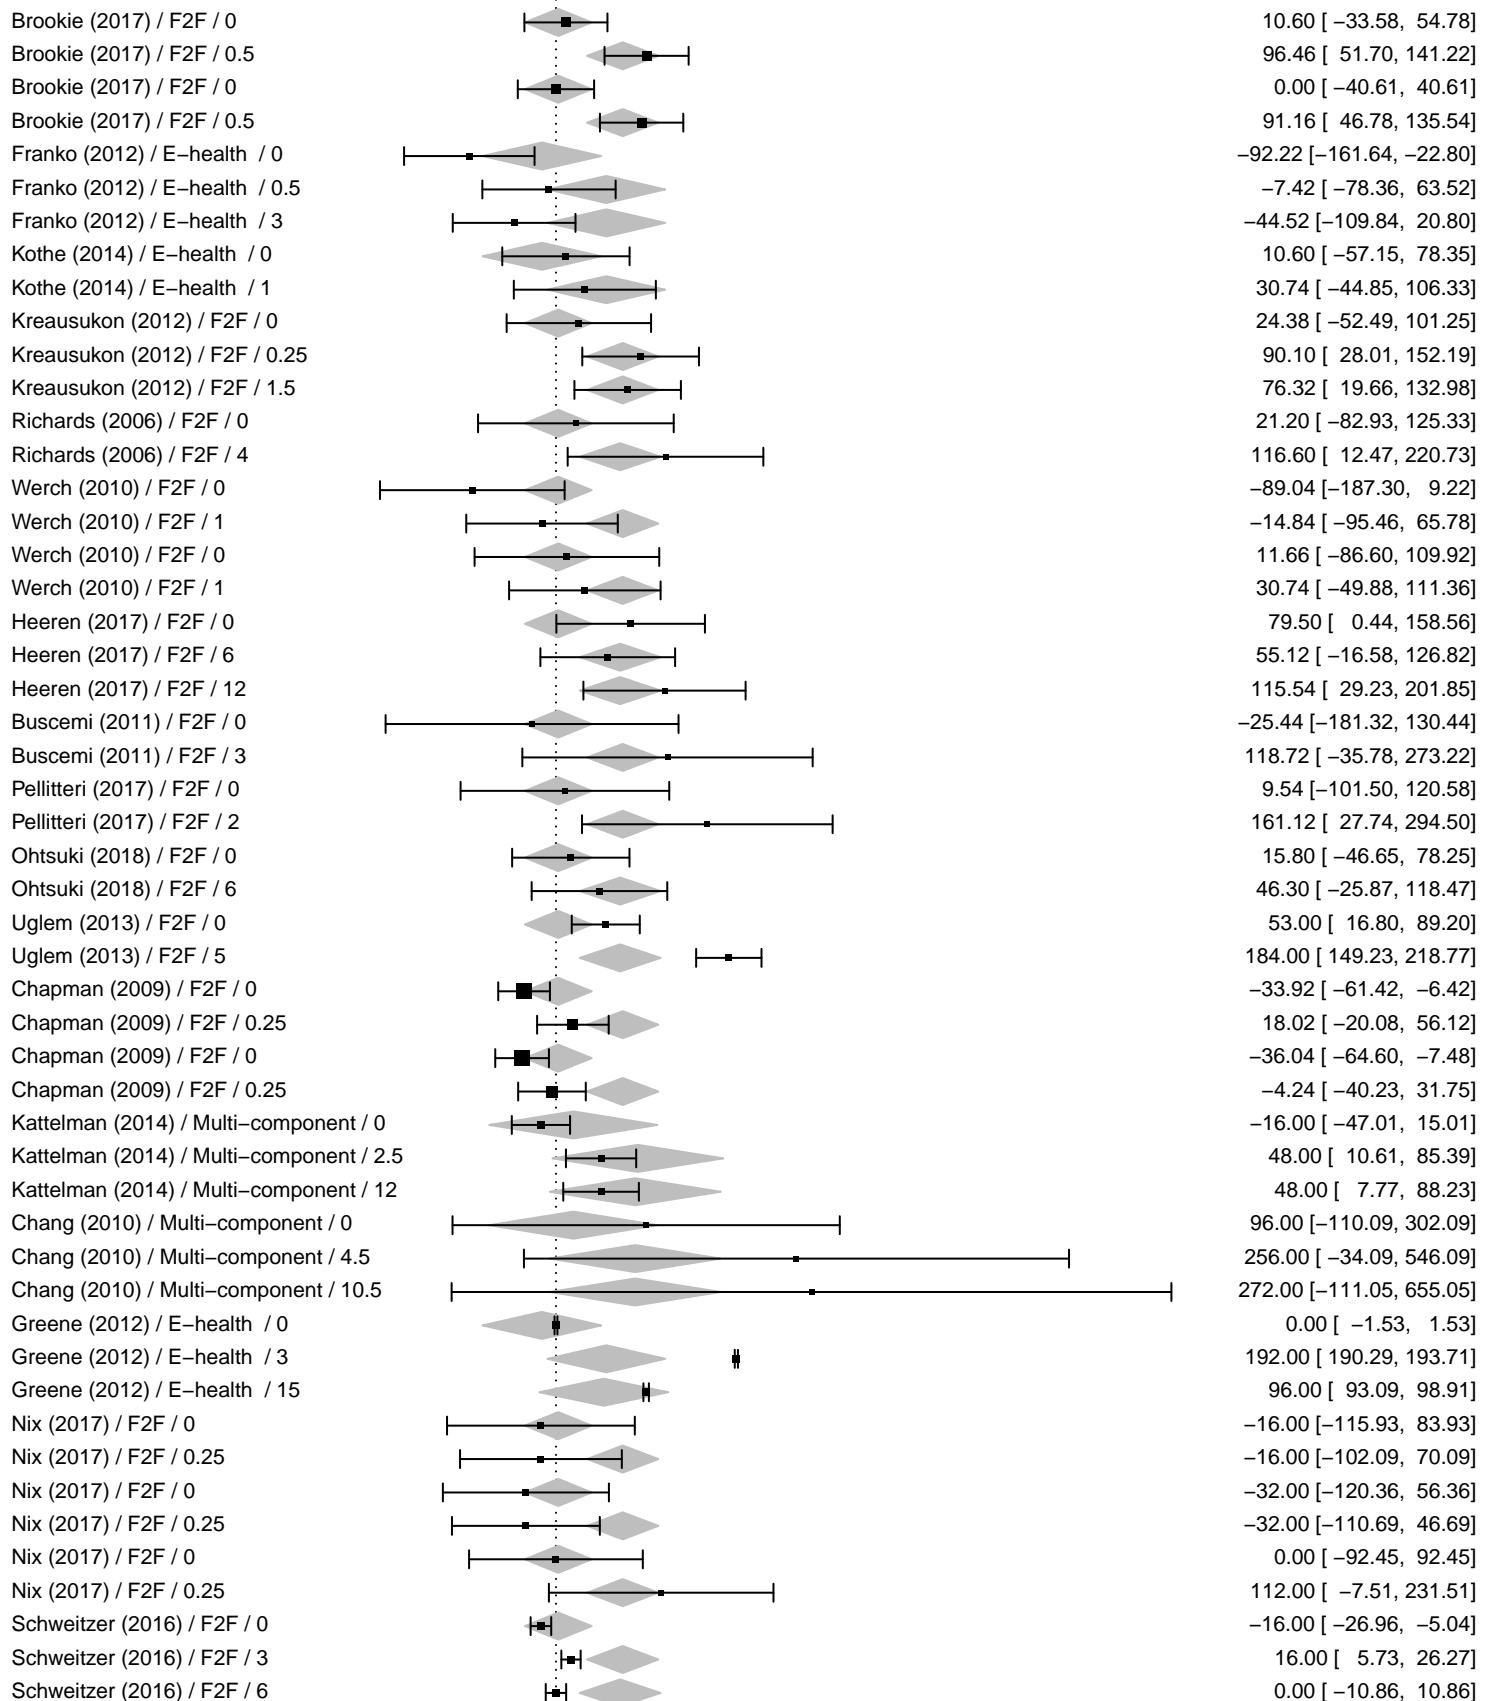

-300

-50

200

450

700

Mean Difference

Supplement: s1 [file s1]

Figure S2: Plots of the means for effects TEI

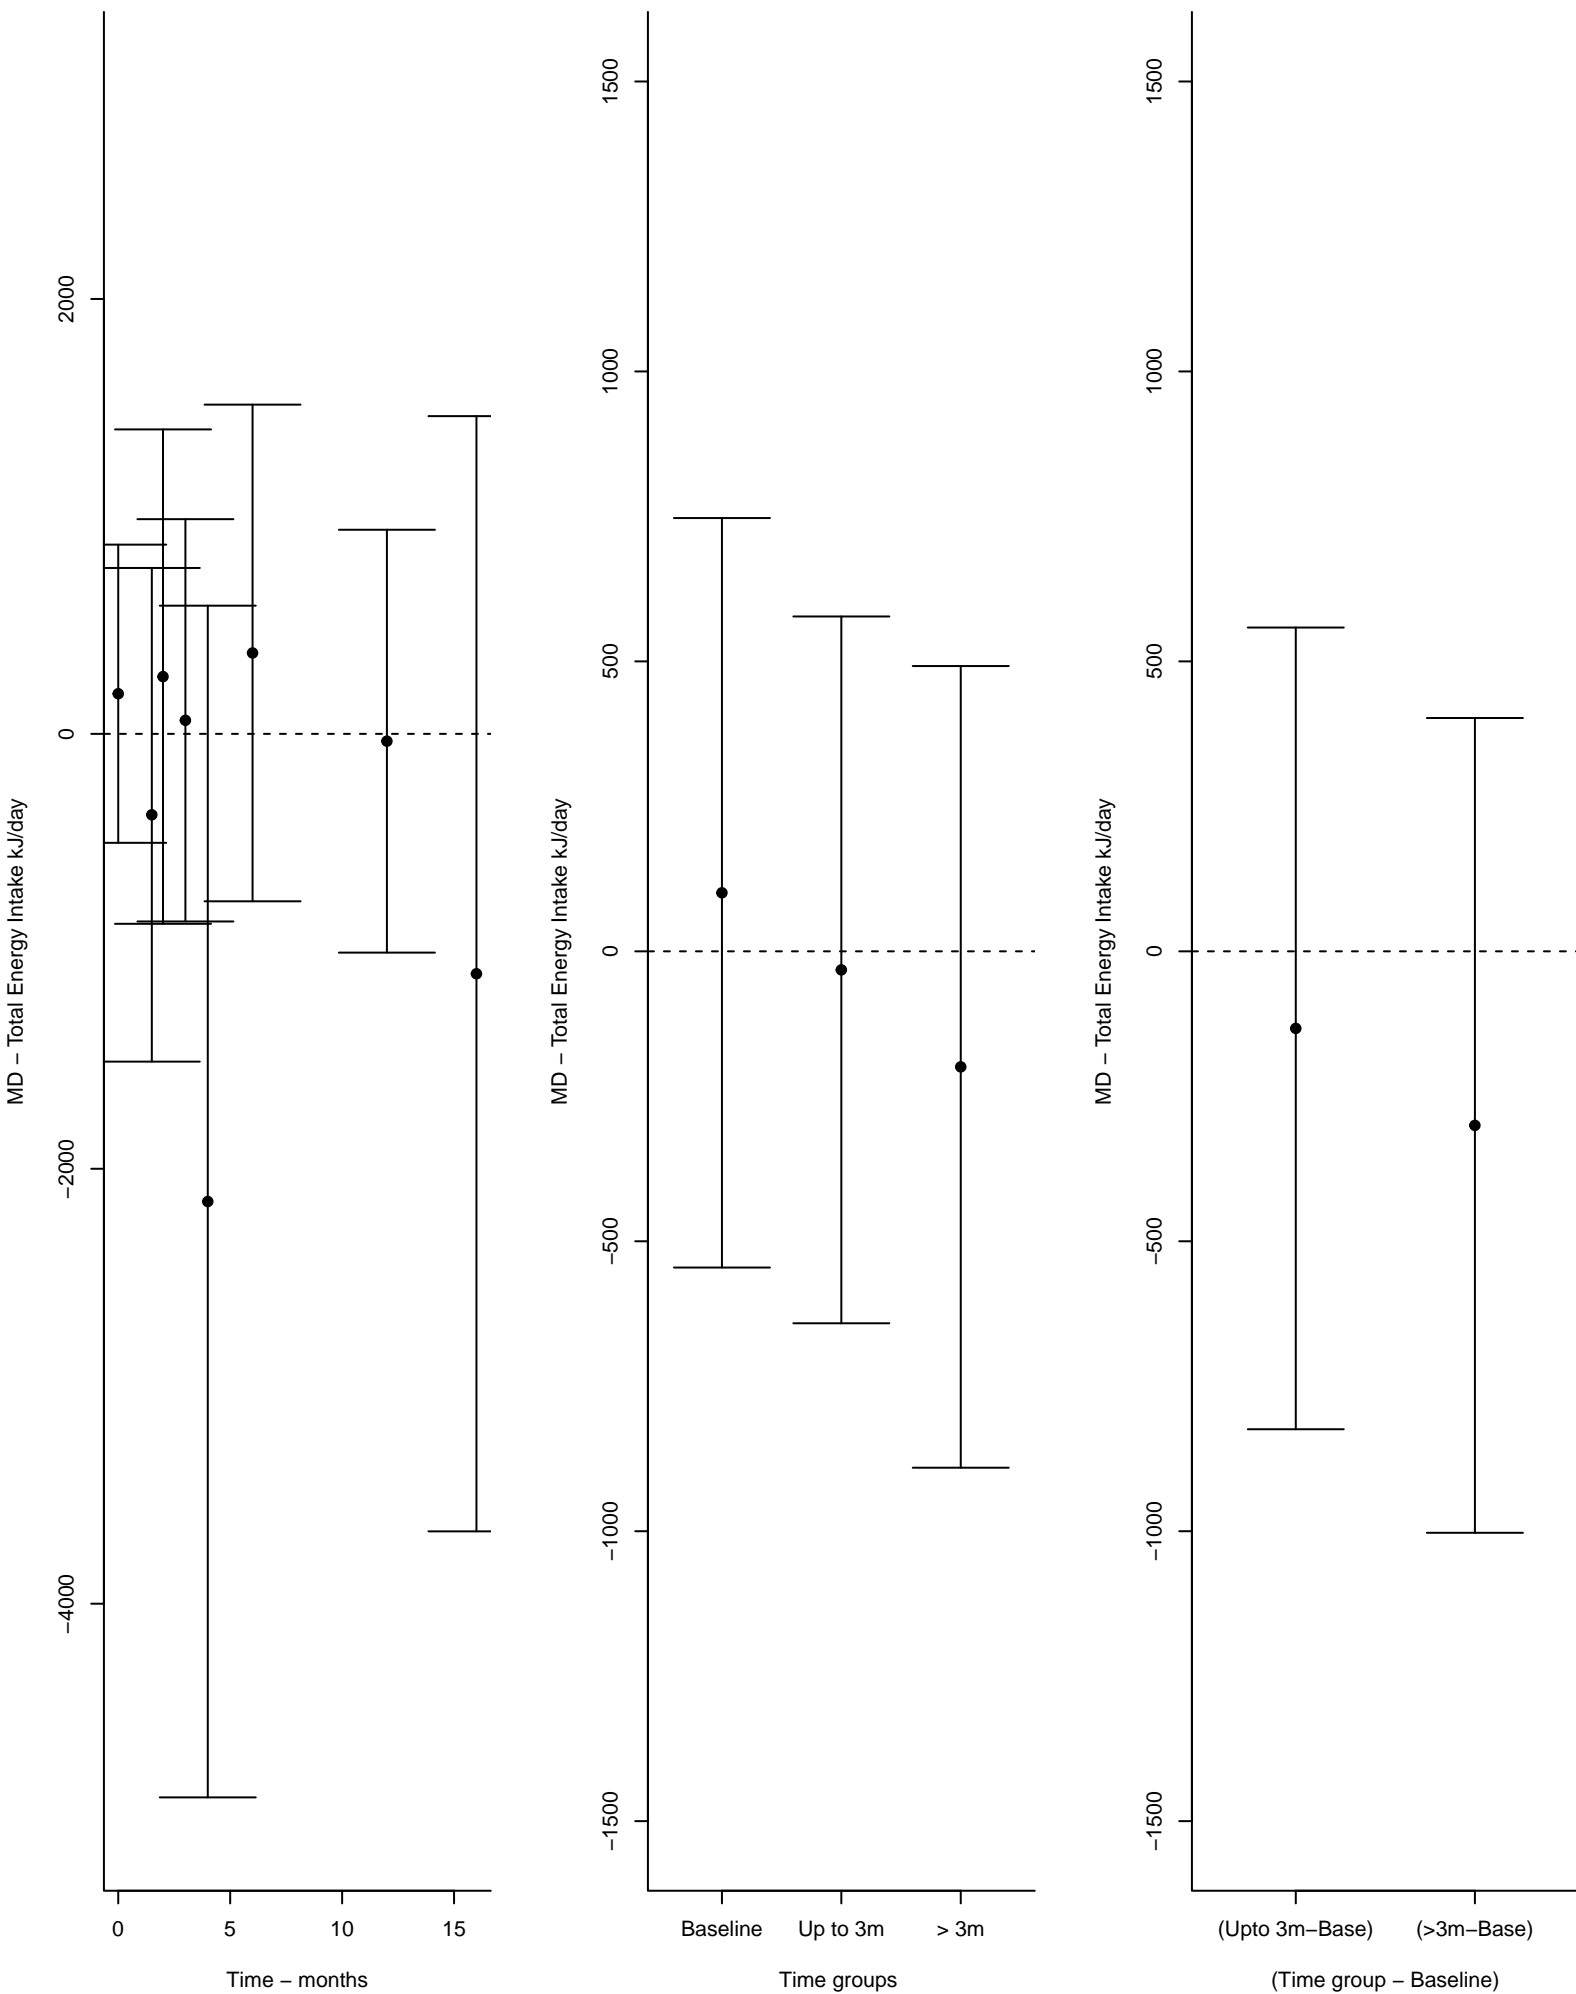

Supplement: s1 [file s1]

**Figure S6: Plots of the means for effects F&V**

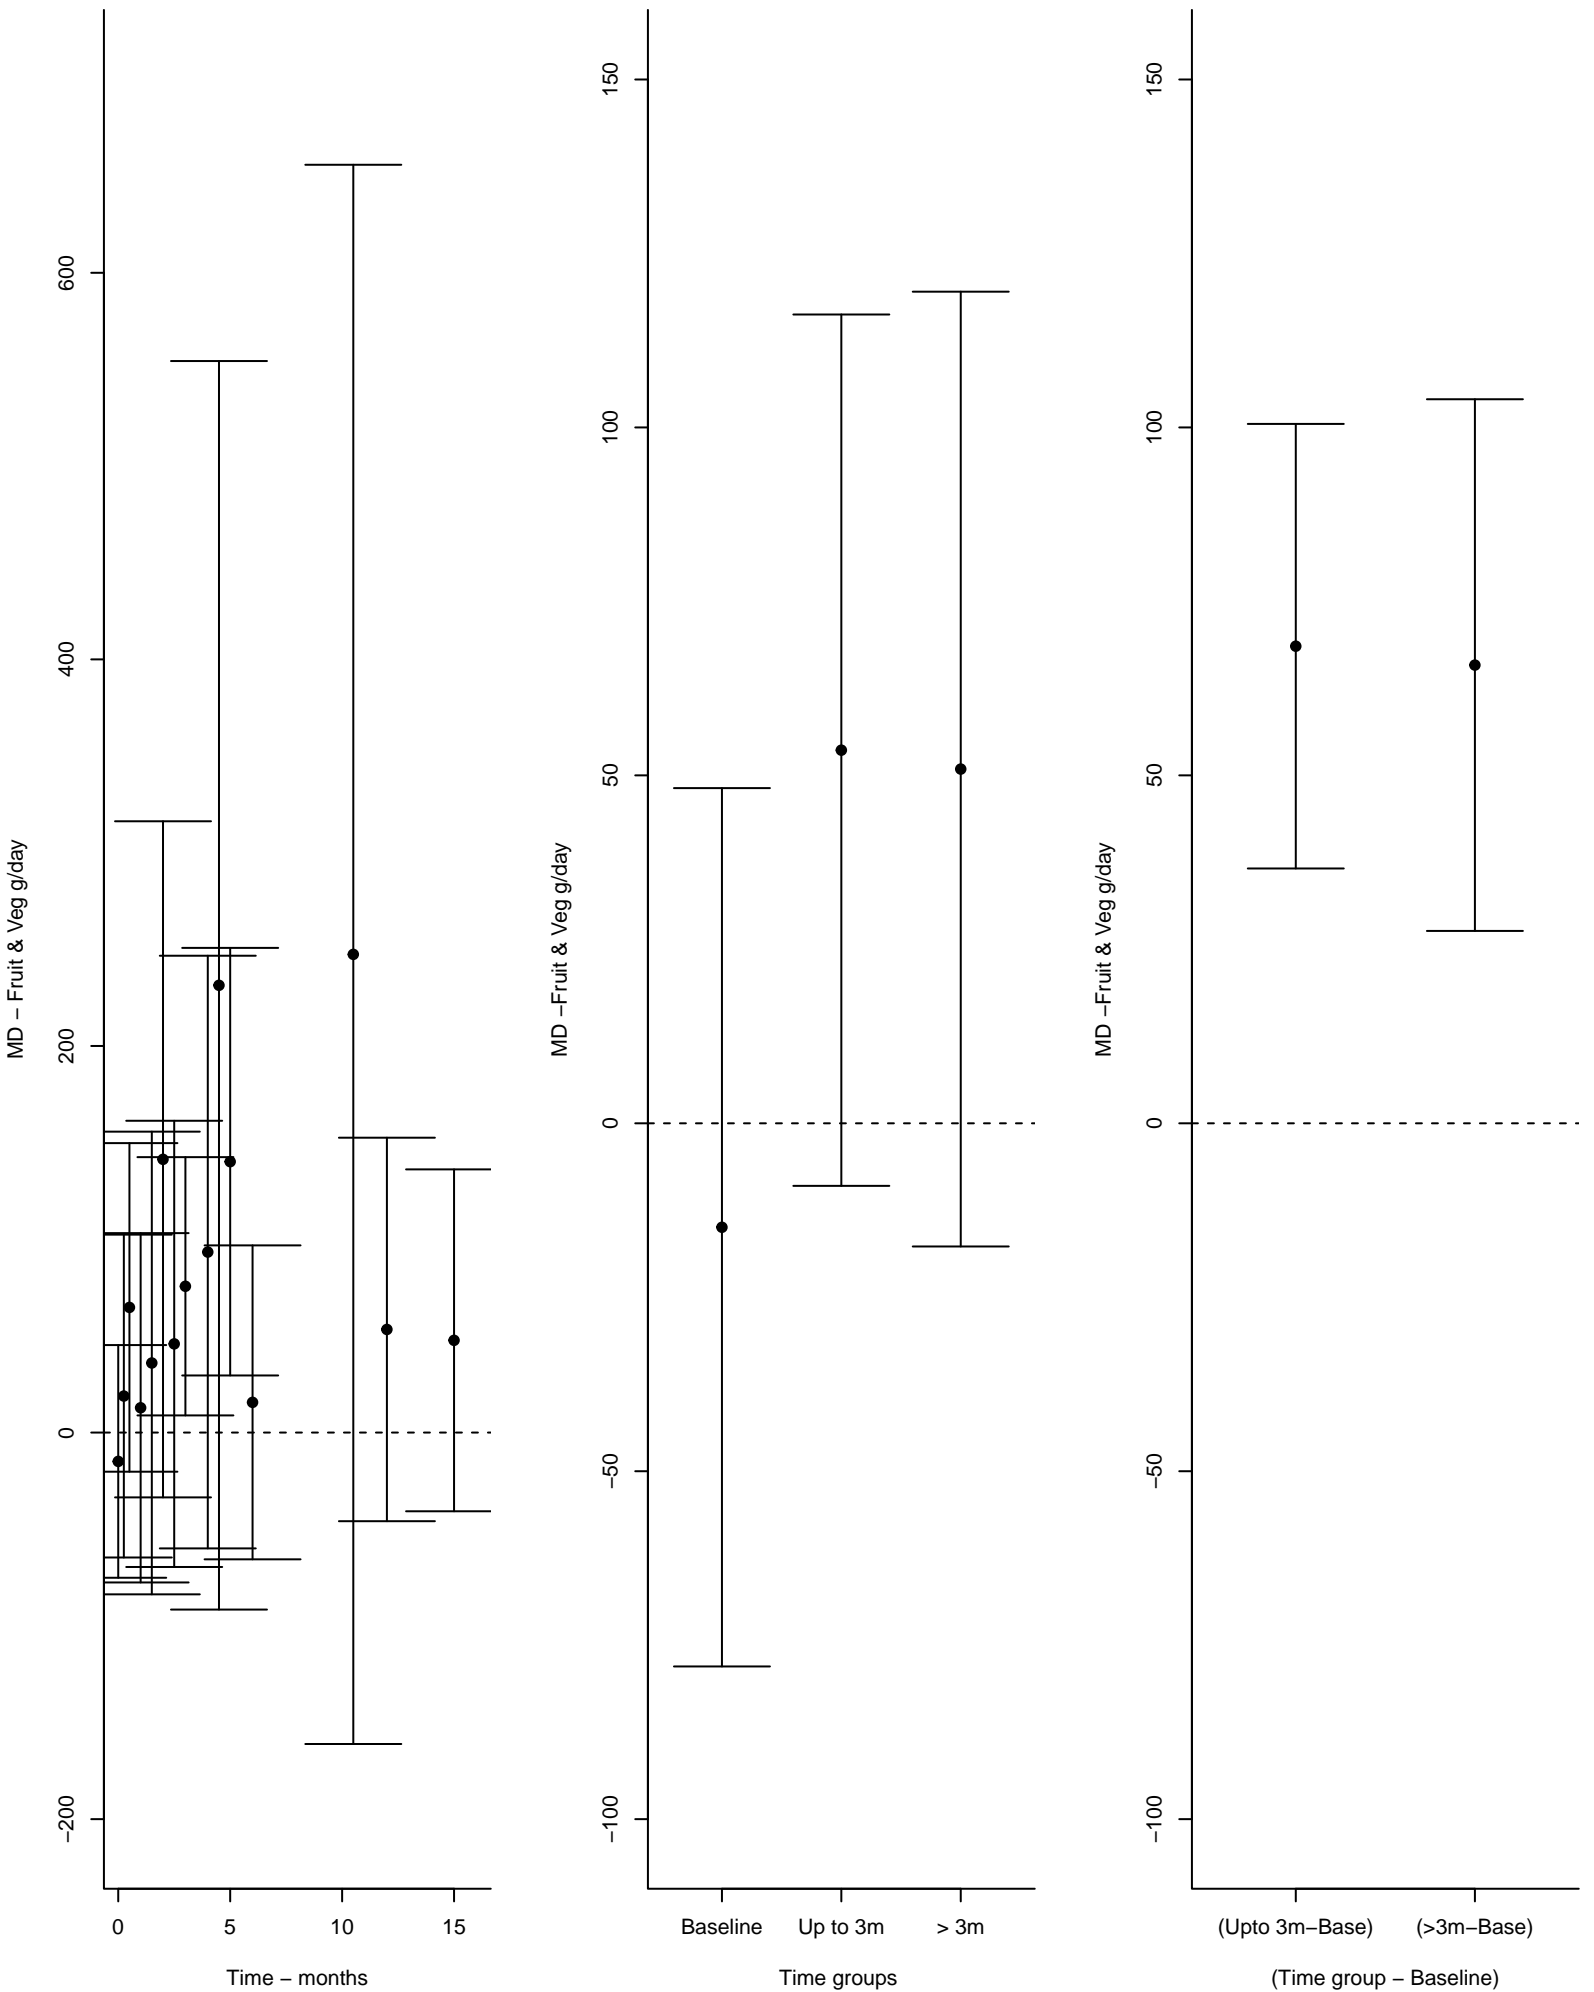

Supplement: s1 [file s1]

Figure S3: Residuals from final model

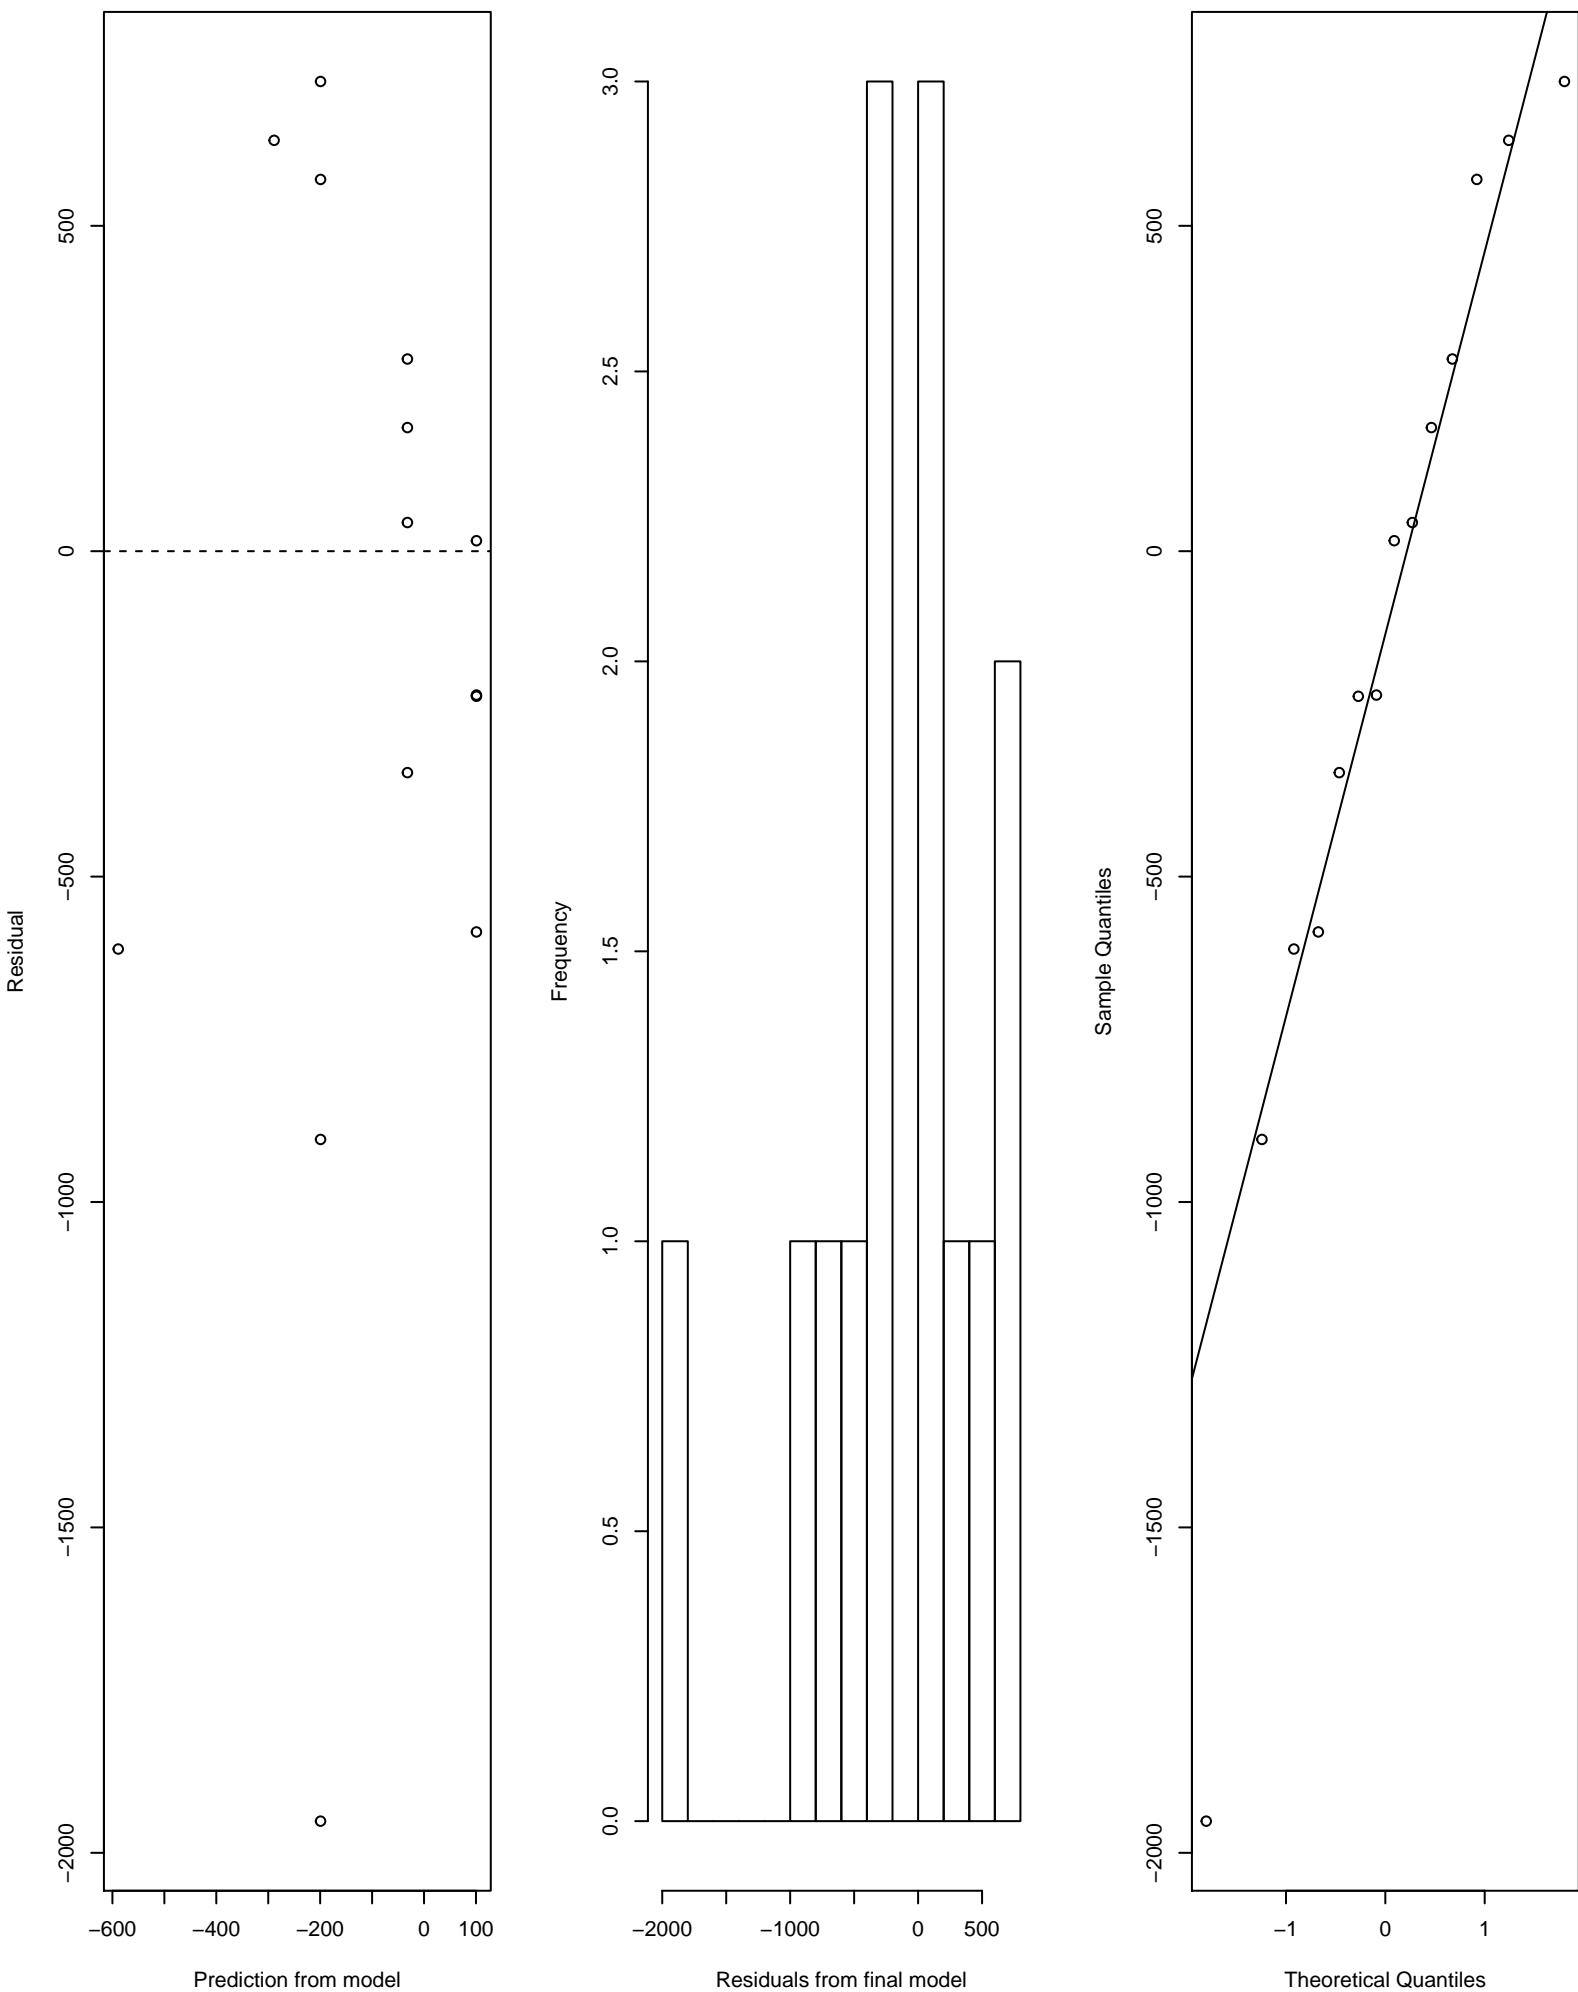

Supplement: s1 [file s1]

Figure S1: Funnel Plot vs Standard Error TEI

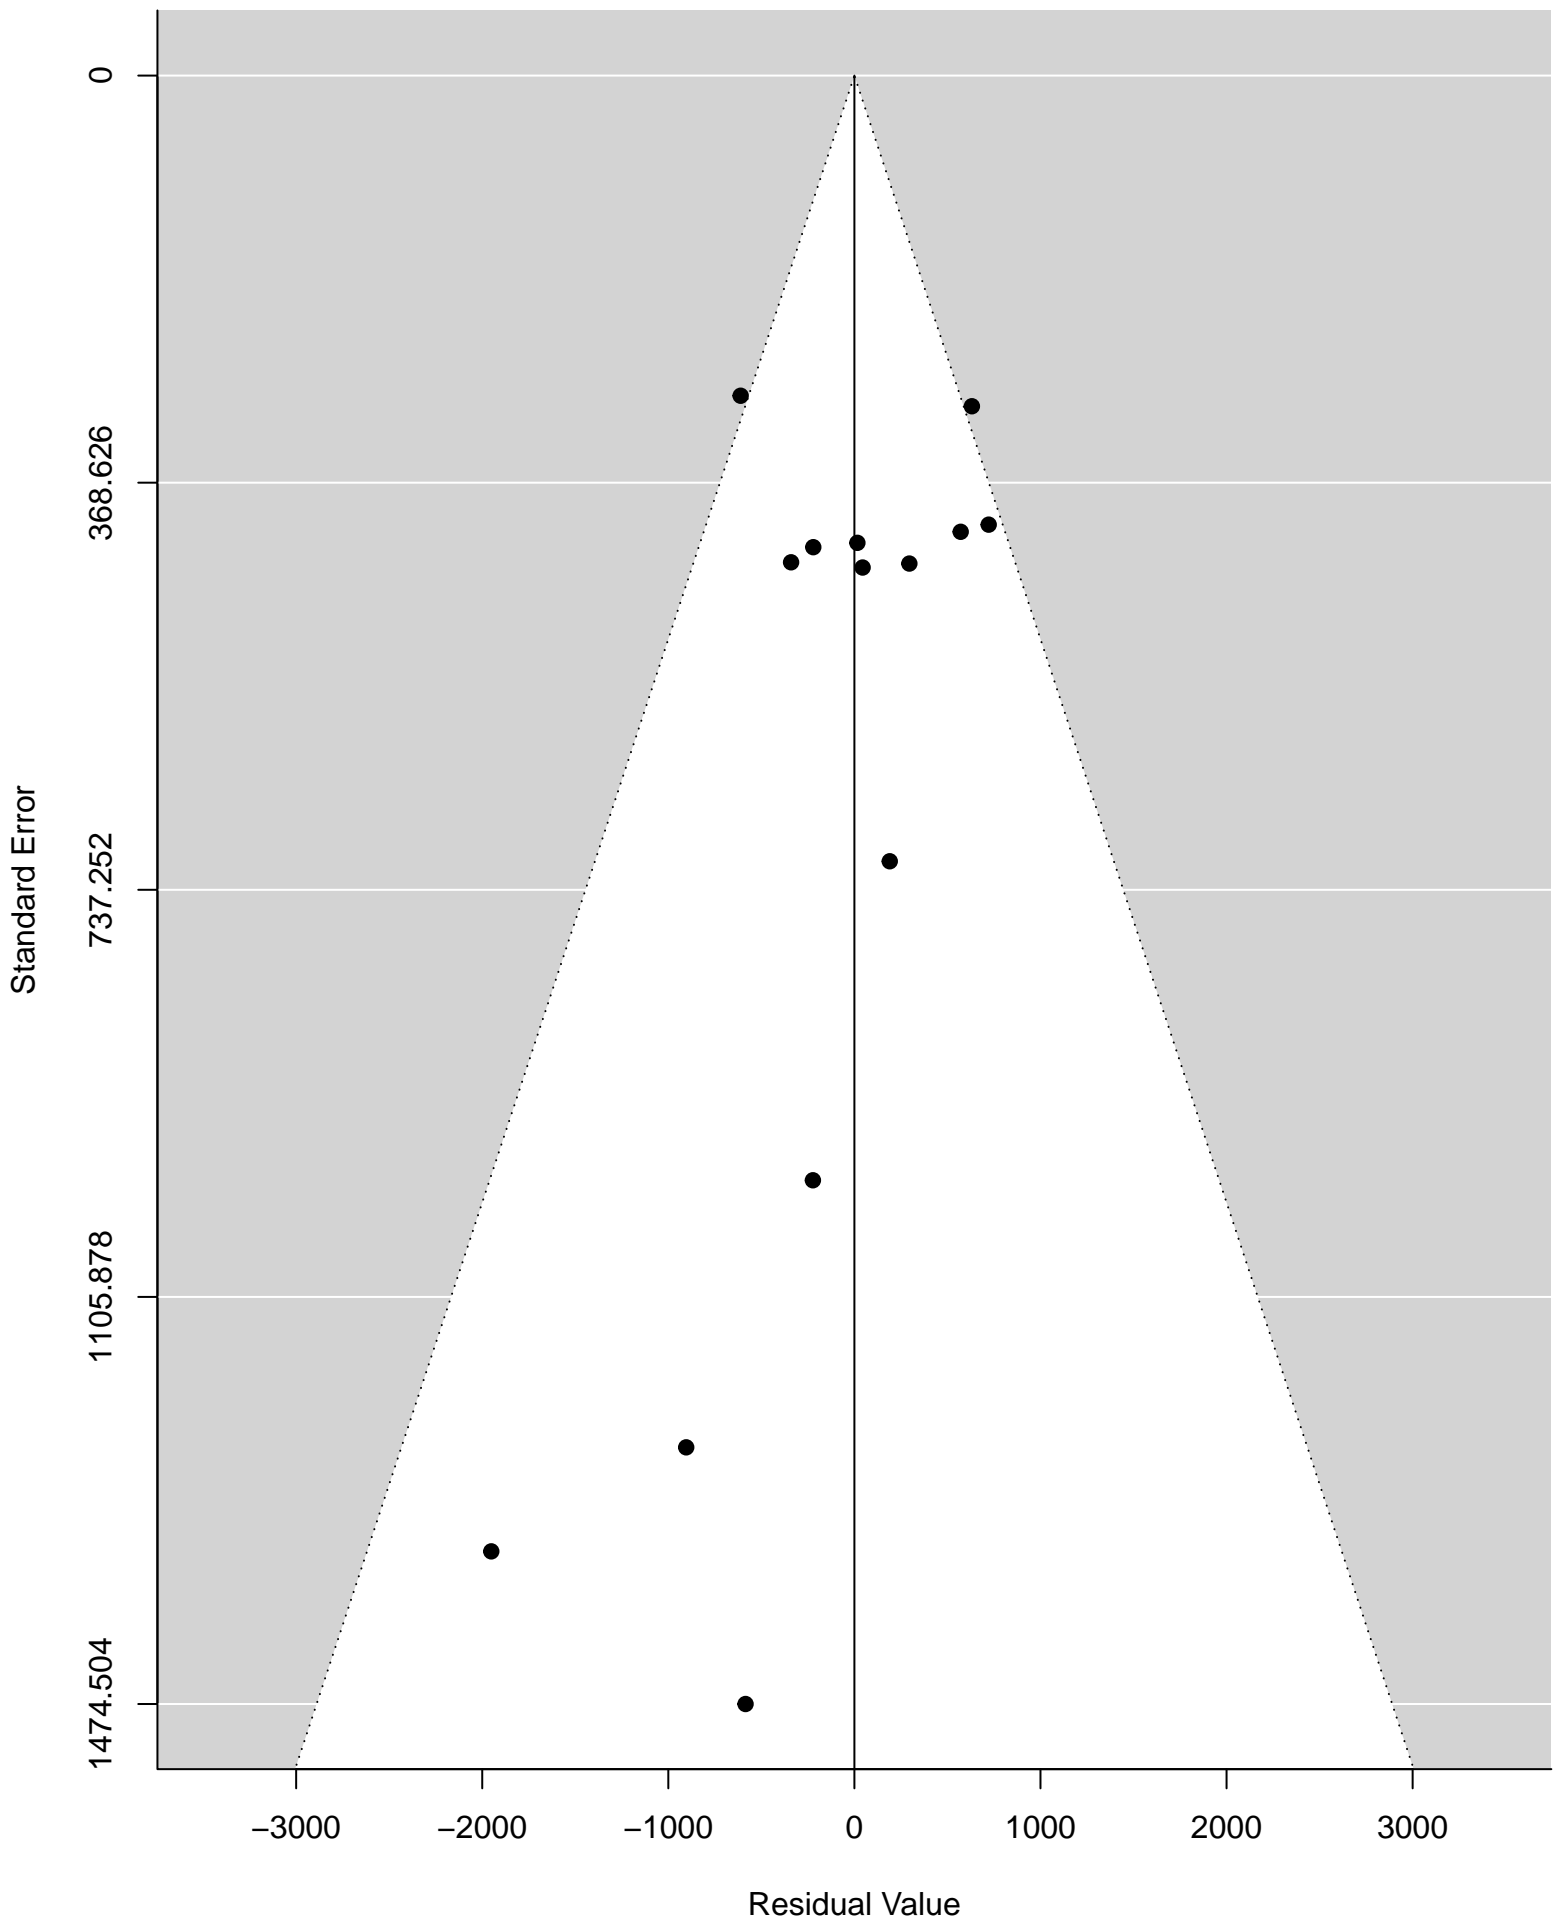

Supplement: s1 [file s1]
